# Supplementary material for: Relative Contribution of Metal Content and Soil Particle Mass to Health Risk of Chromium-Contaminated Soil
Source: MDPI journal article supplement (doi:10.3390/ijerph19095253), 2022-04-26
Supplement: s1 [file s1]

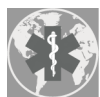

**Table S1.** Correlation matrices among the sample properties and the Cr bioaccessibility.

| Soil properties                            | Particle size | OM (mg·kg <sup>-1</sup> ) | Fe (mg·kg <sup>-1</sup> ) | pH     | Cr(mg·kg <sup>-1</sup> ) | CEC (cmol <sup>+</sup> ·kg <sup>-1</sup> ) | PBET-G   | PBET-GI  | SBRC-G   | SBRC-GI  |
|--------------------------------------------|---------------|---------------------------|---------------------------|--------|--------------------------|--------------------------------------------|----------|----------|----------|----------|
| Low                                        |               |                           |                           |        |                          |                                            |          |          |          |          |
| Particle size                              | 1             | -0.285                    | -0.928**                  | 0.377  | -0.949**                 | -0.512                                     | 0.670**  | 0.848**  | 0.789**  | 0.04     |
| OM (mg·kg <sup>-1</sup> )                  |               | 1                         | 0.329                     | -0.305 | 0.227                    | 0.191                                      | -0.111   | -0.069   | -0.006   | 0.176    |
| Fe (mg·kg <sup>-1</sup> )                  |               |                           | 1                         | -0.43  | 0.894**                  | 0.407                                      | -0.630*  | -0.733** | -0.636*  | 0.138    |
| pH                                         |               |                           |                           | 1      | -0.2                     | -0.072                                     | 0.01     | 0.124    | 0.048    | -0.123   |
| Cr(mg·kg <sup>-1</sup> )                   |               |                           |                           |        | 1                        | 0.609*                                     | -0.829** | -0.912** | -0.846** | -0.156   |
| CEC (cmol <sup>+</sup> ·kg <sup>-1</sup> ) |               |                           |                           |        |                          | 1                                          | -0.778** | -0.718** | -0.746** | -0.657** |
| PBET-G                                     |               |                           |                           |        |                          |                                            | 1        | 0.902**  | 0.881**  | 0.582*   |
| PBET-GI                                    |               |                           |                           |        |                          |                                            |          | 1        | 0.984**  | 0.455    |
| SBRC-G                                     |               |                           |                           |        |                          |                                            |          |          | 1        | 0.556*   |
| SBRC-GI                                    |               |                           |                           |        |                          |                                            |          |          |          | 1        |
| Medium                                     |               |                           |                           |        |                          |                                            |          |          |          |          |
| Particle size                              | 1             | -0.639*                   | -0.680**                  | -0.31  | -0.938**                 | -0.954**                                   | 0.961**  | 0.861**  | 0.923**  | 0.683**  |
| OM (mg·kg <sup>-1</sup> )                  |               | 1                         | 0.591*                    | -0.171 | 0.763**                  | 0.632*                                     | -0.631*  | -0.486   | -0.545*  | -0.373   |
| Fe (mg·kg <sup>-1</sup> )                  |               |                           | 1                         | 0.312  | 0.814**                  | 0.842**                                    | -0.788** | -0.818** | -0.798** | -0.865** |
| pH                                         |               |                           |                           | 1      | 0.292                    | 0.414                                      | -0.382   | -0.507   | -0.481   | -0.539*  |
| Cr(mg·kg <sup>-1</sup> )                   |               |                           |                           |        | 1                        | 0.962**                                    | -0.943** | -0.858** | -0.913** | -0.757** |
| CEC (cmol <sup>+</sup> ·kg <sup>-1</sup> ) |               |                           |                           |        |                          | 1                                          | -0.970** | -0.934** | -0.972** | -0.846** |
| PBET-G                                     |               |                           |                           |        |                          |                                            | 1        | 0.931**  | 0.953**  | 0.769**  |
| PBET-GI                                    |               |                           |                           |        |                          |                                            |          | 1        | 0.980**  | 0.925**  |
| SBRC-G                                     |               |                           |                           |        |                          |                                            |          |          | 1        | 0.897**  |
| SBRC-GI                                    |               |                           |                           |        |                          |                                            |          |          |          | 1        |
| High                                       |               |                           |                           |        |                          |                                            |          |          |          |          |
| Particle size                              | 1             | -0.919**                  | -0.632*                   | 0.283  | 0.304                    | -0.518*                                    | -0.897** | -0.816** | -0.800** | -0.733** |

|                                            |   |        |        |        |        |         |         |         |         |
|--------------------------------------------|---|--------|--------|--------|--------|---------|---------|---------|---------|
| OM (mg·kg <sup>-1</sup> )                  | 1 | 0.569* | -0.472 | -0.142 | 0.536* | 0.859** | 0.784** | 0.822** | 0.740** |
| Fe (mg·kg <sup>-1</sup> )                  |   | 1      | -0.033 | -0.015 | 0.374  | 0.487   | 0.437   | 0.41    | 0.346   |
| pH                                         |   |        | 1      | 0.25   | -0.149 | -0.418  | -0.39   | -0.443  | -0.387  |
| Cr(mg·kg <sup>-1</sup> )                   |   |        |        | 1      | 0.419  | -0.578* | -0.596* | -0.525* | -0.588* |
| CEC (cmol <sup>+</sup> ·kg <sup>-1</sup> ) |   |        |        |        | 1      | 0.156   | -0.024  | 0.022   | -0.1    |
| PBET-G                                     |   |        |        |        |        | 1       | 0.976** | 0.970** | 0.945** |
| PBET-GI                                    |   |        |        |        |        |         | 1       | 0.985** | 0.982** |
| SBRC-G                                     |   |        |        |        |        |         |         | 1       | 0.989** |
| SBRC-GI                                    |   |        |        |        |        |         |         |         | 1       |

Note that “\*” Significant at  $p < 0.05$  level; “\*\*” Significant at  $p < 0.01$  level. “-”, negative correlation; “+”, positive correlation. OM: Organic Matter; CEC: Cation Exchange Capacity. SBRC: Cr bioaccessibility (%) estimated through the SBRC method; PBET: Cr bioaccessibility (%) estimated through the PBET method; “G”, gastric phase; “GI”, gastrointestinal phase
